# Supplementary material for: A cross-sectional questionnaire study of the rules governing pupils’ carriage of inhalers for asthma treatment in secondary schools in North East England
Source: PeerJ. 2016 May 5;4:e2006. doi: 10.7717/peerj.2006 (PMC4860314; doi:10.7717/peerj.2006)
Supplement: Data S1 [file peerj-04-2006-s001.xlsx]

## Sheet: Sheet1
					Response rate		Question 1: Inhaler rules				Question 2: Standby inhaler
LA	Number of schools screened	Excluded due to age	Special school	Included	Responded	Did not respond	Automatically allowed to carr	Parental permission required	Inhalers stored in central location	Unclear response - excluded	Yes - have a standby inhaler	No - do not have a standby inhaler	Not asked (i.e. pilot phase)	Unclear response - excluded
LA1	274	235	8	31	19	12	13	4	0	2	9	10	0	0
LA2	35	26	2	7	3	4	3	0	0	0	1	2	0	0
LA3	83	70	4	9	8	1	5	1	0	2	4	4	0	0
LA4	37	30	2	5	4	1	3	0	0	1	2	2	0	0
LA5	52	42	3	7	7	0	6	0	0	1	4	3	0	0
LA6	95	75	5	12	7	5	4	3	0	0	5	2	0	0
LA7	78	61	5	12	6	6	2	4	0	0	2	4	0	0
LA8	172	147	8	16	12	4	10	2	0	0	4	7	0	1
LA9	60	44	3	12	9	3	9	0	0	0	4	5	0	0
LA10	64	49	5	9	6	3	3	3	0	0	0	3	3	0
LA11	80	58	3	15	10	5	7	3	0	0	5	5	0	0
LA12	103	78	7	18	15	3	10	2	1	2	5	10	0	0
Totals	1133	915	55	153	106	47	75	22	1	8	45	57	3	1
